# Supplementary material for: Exploring the BiFeO3-PbTiO3-SrTiO3 Ternary System to Obtain Good Piezoelectrical Properties at Low and High Temperatures
Source: MDPI journal article supplement (doi:10.3390/ma16216840), 2023-10-24
Supplement: s1 [file s1]

## Supplementary Information

**Table S1.** Relative density and piezoelectric properties.

|     | Composition             | Type | Relative Density (%) | d <sub>33</sub> (pC/N) |
|-----|-------------------------|------|----------------------|------------------------|
| I   | 0.40BFO-0.20PT-0.40ST   | C    | 98                   | 0                      |
|     | 0.45BFO-0.20PT-0.35ST   | PC   | 98                   | 25                     |
|     | 0.50BFO-0.20PT-0.30ST   | PC   | 97                   | 140                    |
|     | 0.55BFO-0.20PT-0.25ST   | PC   | 97                   | 105                    |
|     | 0.60BFO-0.20PT-0.20ST   | PC   | -                    | 81                     |
|     | 0.70BFO-0.20PT-0.10ST   | Rh   | -                    | 28                     |
|     | 0.80BFO-0.20PT-0.00ST * | Rh   | 95                   | 30                     |
| II  | 0.70BFO-0.00PT-0.30ST * | PC   | -                    | 60                     |
|     | 0.55BFO-0.15PT-0.30ST   | PC   | -                    | 75                     |
|     | 0.50BFO-0.20PT-0.30ST   | PC   | 97                   | 140                    |
|     | 0.45BFO-0.25PT-0.30ST   | PC   | -                    | 250                    |
|     | 0.40BFO-0.30PT-0.30ST   | PC   | 98                   | 145                    |
| III | 0.40BFO-0.25PT-0.35ST   | C    | -                    | 0                      |
|     | 0.50BFO-0.15PT-0.35ST   | PC   | 97                   | 120                    |
|     | 0.55BFO-0.10PT-0.35ST   | C    | 97                   | 0                      |
|     | 0.60BFO-0.15PT-0.25ST   | PC   | -                    | 77                     |
|     | 0.50BFO-0.25PT-0.25ST   | PC   | -                    | 80                     |
|     | 0.70BFO-0.10PT-0.20ST   | Rh   | 95                   | 60                     |
|     | 0.70BFO-0.20PT-0.10ST   | Rh   | 96                   | 28                     |

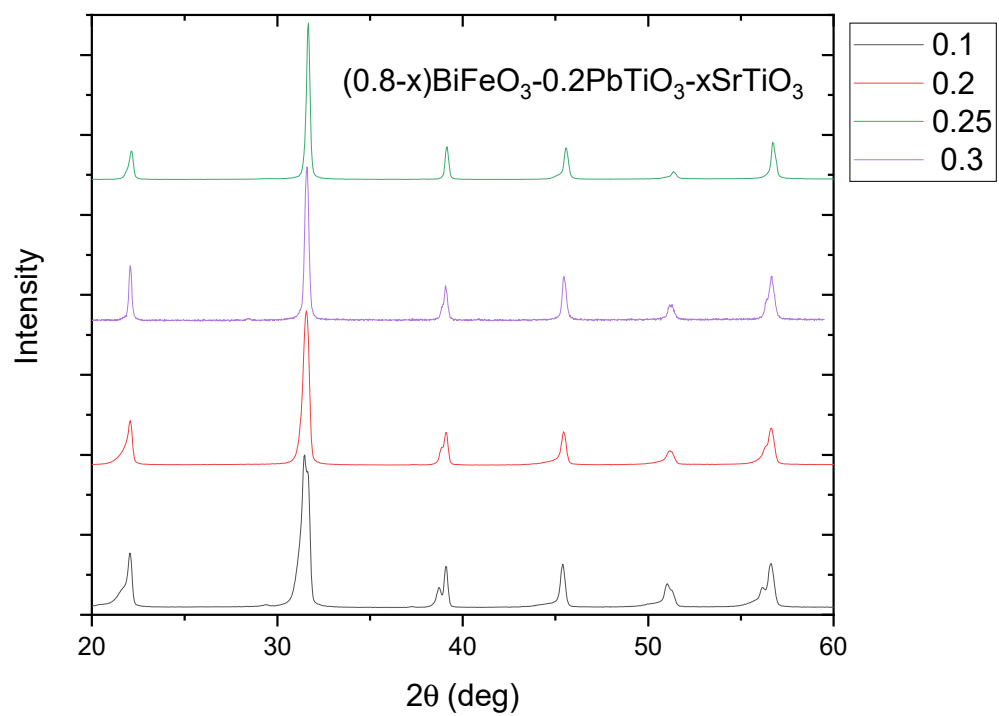

**Figure S1.** XRD patterns.
